# Supplementary material for: Scaling properties reveal regulation of river flows in the Amazonthrough a forest reservoir
Source: Copernicus journal article supplement (doi:10.5194/hess-2017-278), 2017-05-29
Supplement: Supplementary file 1 [file hess-2017-278-supplement.pdf]

# Supplementary information for *Scaling properties reveal regulation of river flows in the Amazon through a “forest reservoir”*

Juan F. Salazar<sup>1</sup>, Juan C. Villegas<sup>1,2</sup>, Angela M. Rendón<sup>1</sup>, Estiven Rodríguez<sup>1</sup>, Isabel Hoyos<sup>3,4</sup>, Daniel Mercado-Bettín<sup>1</sup>, and Germán Poveda<sup>5</sup>

<sup>1</sup>GIGA, Escuela Ambiental, Facultad de Ingeniería, Universidad de Antioquia, Medellín, Colombia

<sup>2</sup>School of Natural Resources and the Environment, University of Arizona, Tucson, USA

<sup>3</sup>GAIA, Escuela Ambiental, Facultad de Ingeniería, Universidad de Antioquia, Medellín, Colombia

<sup>4</sup>Instituto de Física, Universidad de Antioquia, Medellín, Colombia

<sup>5</sup>Universidad Nacional de Colombia, Sede Medellín, Departamento de Geociencias y Medio Ambiente, Facultad de Minas, Medellín, Colombia

*Correspondence to:* Juan F. Salazar (juan.salazar@udea.edu.co)

## Contents

1. River flow data: Table S1
2. Estimation of power laws: Figures S1 to S6, and Table S2.
3. Tests for the difference between the values of the scaling exponents and the critical value 1: Tables S3 to S8.

## 5 River flow data

Details about the river flow records and gauges used in this study are given in Supplementary Table S1. The location of the 85 gauges is indicated in Figure 1. Mean and extreme river flows were computed from daily records. Any year with less than 320 daily records was discarded. The length of the records that were used in the calculations vary between 26 and 47 years, with an average of 38 years. Drainage areas vary between 1,617 km<sup>2</sup> at Pari Cachoeira and 4,680,000 km<sup>2</sup> at Obidos.

Table S1: River flow gauges provided by the SO-HYBAM project (formerly ORE-HYBAM project, www.ore-hybam.org).

| ID | Code     | Name                         | River          | Initial date | Final date | Record length (yr) | Lat. (°) | Lon. (°) | Drainage area (km <sup>2</sup> ) |
|----|----------|------------------------------|----------------|--------------|------------|--------------------|----------|----------|----------------------------------|
| 1  | 14300000 | Pari Cachoeira               | Tiquie         | 7/7/1980     | 4/29/2014  | 34                 | 0.25     | -69.78   | 1,617                            |
| 2  | 18250000 | Uruara                       | Para do Uruara | 12/14/1978   | 4/29/2014  | 36                 | -3.68    | -53.55   | 2,628                            |
| 3  | 14540000 | Fazenda Bandeira Branca      | Cotingo        | 10/2/1970    | 4/29/2014  | 44                 | 4.63     | -60.47   | 3,075                            |
| 4  | 15050000 | Pontes e Lacerda             | Guapore        | 8/21/1971    | 7/30/2014  | 43                 | -15.22   | -59.35   | 3,140                            |
| 5  | 15565000 | Jaru                         | Jaru           | 6/22/1981    | 3/30/2012  | 31                 | -10.45   | -62.47   | 3,965                            |
| 6  | 14310000 | Cunuri                       | Tiquie         | 8/15/1982    | 4/29/2014  | 32                 | 0.21     | -69.38   | 4,198                            |
| 7  | 14220000 | Louro Poco                   | Aiari          | 8/2/1982     | 10/30/2008 | 26                 | 1.34     | -68.69   | 4,708                            |
| 8  | 17230000 | Lucas do Rio Verde           | Verde          | 8/17/1973    | 4/16/2007  | 34                 | -13.05   | -55.90   | 5,327                            |
| 9  | 14550000 | Maloca do Contao             | Cotingo        | 9/5/1975     | 4/29/2014  | 39                 | 4.17     | -60.53   | 5,815                            |
| 10 | 18280000 | Apalai                       | Paru de Este   | 7/25/1980    | 9/29/2012  | 32                 | 1.22     | -54.66   | 5,902                            |
| 11 | 15750000 | Humboldt                     | Aripuana       | 5/25/1979    | 6/29/2014  | 35                 | -10.17   | -59.46   | 6,653                            |
| 12 | 15430000 | Ariquemes                    | Jamari         | 7/16/1970    | 5/30/2014  | 44                 | -9.93    | -63.06   | 7,295                            |
| 13 | 14526000 | Bom Fim                      | Tacutu         | 7/7/1984     | 4/29/2014  | 30                 | 3.38     | -59.82   | 9,744                            |
| 14 | 12360000 | Foz do Breu                  | Jurua          | 6/21/1982    | 6/1/2012   | 30                 | -9.40    | -72.70   | 10,141                           |
| 15 | 14350000 | Jusante da Cachoeira do Caju | Curicuriari    | 6/2/1982     | 3/30/2014  | 32                 | -0.25    | -67.01   | 10,228                           |
| 16 | 13550000 | Xapuri                       | Acre           | 2/17/1968    | 1/30/2014  | 46                 | -10.65   | -68.51   | 11,765                           |
| 17 | 15558000 | Pimenta Bueno                | Apedia         | 5/30/1980    | 7/30/2014  | 34                 | -11.68   | -61.19   | 12,346                           |
| 18 | 15550000 | Santa Isabel                 | Candeias       | 3/10/1976    | 6/29/2014  | 38                 | -8.80    | -63.71   | 12,640                           |

— Continues in the next page —

— Come from previous page —

|    |          |                              |             |            |            |    |        |        |        |
|----|----------|------------------------------|-------------|------------|------------|----|--------|--------|--------|
| 19 | 14680001 | Fe d Esperanca               | Mucajai     | 12/8/1973  | 4/29/2014  | 41 | 2.87   | -61.44 | 13,658 |
| 20 | 12880000 | Estirao da Santa Cruz        | Tefe        | 2/10/1981  | 3/30/2014  | 33 | -4.29  | -65.20 | 13,708 |
| 21 | 15910000 | Sucunduri                    | Sucunduri   | 10/24/1973 | 9/29/2013  | 40 | -6.80  | -59.04 | 13,938 |
| 22 | 14440000 | Posto Ajuricaba              | Demeni      | 5/29/1982  | 4/29/2014  | 32 | 0.88   | -62.62 | 14,756 |
| 23 | 12650000 | Feijo                        | Envira      | 9/26/1980  | 5/19/2012  | 32 | -8.15  | -70.37 | 15,329 |
| 24 | 12370000 | Taumaturgo                   | Jurua       | 4/14/1981  | 5/31/2012  | 31 | -8.93  | -72.78 | 16,581 |
| 25 | 18200000 | Arapari                      | Maicuru     | 7/1/1972   | 2/27/2014  | 42 | -1.78  | -54.40 | 17,072 |
| 26 | 15120001 | Vila Bela da Santis Trindade | Guapore     | 7/1/1976   | 7/30/2014  | 38 | -15.01 | -59.95 | 18,412 |
| 27 | 14230000 | Missao Icana                 | Icana       | 7/17/1980  | 3/30/2014  | 34 | 1.07   | -67.59 | 22,282 |
| 28 | 17090000 | Boca do Inferno              | Curua       | 3/29/1973  | 9/29/2013  | 40 | -1.50  | -54.87 | 22,500 |
| 29 | 13600002 | Rio Branco                   | Acre        | 8/9/1967   | 5/30/2014  | 47 | -9.98  | -67.80 | 22,670 |
| 30 | 16500000 | Estirao da Angelica          | Mapuera     | 11/22/1970 | 4/29/2014  | 44 | -1.10  | -57.06 | 26,040 |
| 31 | 15560000 | Ji-Parana                    | Jiparana    | 12/16/1977 | 7/30/2014  | 37 | -10.87 | -61.94 | 33,012 |
| 32 | 13650000 | Floriano Peixoto             | Acre        | 7/26/1967  | 4/29/2014  | 47 | -9.05  | -67.37 | 33,469 |
| 33 | 18650000 | Cajueiro                     | Curua       | 11/20/1975 | 11/29/2011 | 36 | -5.65  | -54.52 | 34,693 |
| 34 | 17120000 | Porto dos Gauchos            | Arinos      | 9/15/1973  | 5/30/2014  | 41 | -11.54 | -57.42 | 36,913 |
| 35 | 14495000 | Fazenda Cajupiranga          | Uraricoera  | 8/10/1979  | 3/30/2014  | 35 | 3.44   | -61.04 | 37,430 |
| 36 | 13886000 | Bacaba                       | Cuniua      | 12/15/1979 | 3/20/2014  | 35 | -6.32  | -64.88 | 38,270 |
| 37 | 12500000 | Cruzeiro do Sul              | Jurua       | 8/24/1967  | 6/4/2012   | 45 | -7.61  | -72.68 | 38,537 |
| 38 | 17280000 | Cachoeirao                   | Teles Pires | 11/18/1975 | 7/30/2014  | 39 | -11.65 | -55.70 | 39,000 |
| 39 | 14260000 | Uaracu                       | Uaupes      | 12/3/1977  | 11/29/2011 | 34 | 0.48   | -69.13 | 40,506 |

— Continues in the next page —

— Come from previous page —

|    |          |                      |             |            |            |    |        |        |         |
|----|----------|----------------------|-------------|------------|------------|----|--------|--------|---------|
| 40 | 18500000 | Boa Esperanca        | Fresco      | 1/23/1976  | 11/29/2013 | 37 | -6.72  | -51.78 | 43,030  |
| 41 | 14280001 | Taraqua              | Uaupes      | 5/23/1977  | 4/29/2014  | 37 | 0.13   | -68.54 | 44,732  |
| 42 | 15800000 | Boca do Guariba      | Aripuana    | 12/12/1977 | 12/30/2011 | 34 | -7.68  | -60.30 | 47,773  |
| 43 | 15130000 | Pimenteiras          | Guapore     | 6/26/1983  | 7/30/2014  | 31 | -13.48 | -61.05 | 50,055  |
| 44 | 14515000 | Fazenda Passarao     | Uraricoera  | 5/2/1977   | 2/27/2014  | 37 | 3.21   | -60.57 | 50,985  |
| 45 | 19150000 | Sao Francisco        | Jari        | 7/2/1972   | 3/21/2014  | 42 | -0.57  | -52.58 | 51,340  |
| 46 | 17093000 | Fontanilhas          | Juruena     | 1/27/1978  | 6/29/2014  | 36 | -11.36 | -58.34 | 52,200  |
| 47 | 12520000 | Ipixuna              | Jurua       | 10/10/1981 | 6/14/2012  | 31 | -7.05  | -71.68 | 55,806  |
| 48 | 15580000 | Tabajara             | Jiparana    | 12/13/1977 | 5/30/2014  | 37 | -8.93  | -62.05 | 60,212  |
| 49 | 14110000 | Cucui                | Negro       | 7/23/1980  | 4/29/2014  | 34 | 1.22   | -66.85 | 61,781  |
| 50 | 13410000 | Seringal da Caridade | Purus       | 8/2/1967   | 4/29/2014  | 47 | -9.04  | -68.57 | 63,166  |
| 51 | 17340000 | Indeco               | Teles Pires | 11/2/1975  | 8/30/2014  | 39 | -10.11 | -55.57 | 64,650  |
| 52 | 12550000 | Eirunepe-Montante    | Jurua       | 2/23/1979  | 6/20/2012  | 33 | -6.68  | -69.90 | 77,136  |
| 53 | 13710001 | Valparaiso           | Purus       | 2/27/1975  | 4/29/2014  | 39 | -8.68  | -67.40 | 103,285 |
| 54 | 15830000 | Praia Velha          | Aripuana    | 6/3/1974   | 9/29/2013  | 39 | -7.25  | -60.40 | 108,578 |
| 55 | 15150000 | Pedras Negras        | Guapore     | 12/18/1980 | 7/30/2014  | 34 | -12.85 | -62.90 | 109,788 |
| 56 | 14250000 | Sao Felipe           | Negro       | 12/9/1977  | 4/29/2014  | 37 | 0.37   | -67.31 | 110,862 |
| 57 | 14710000 | Caracarai            | Branco      | 1/2/1967   | 5/30/2014  | 47 | 1.82   | -61.12 | 124,980 |
| 58 | 12700000 | Santos Dumont        | Jurua       | 4/17/1981  | 5/30/2014  | 33 | -6.44  | -68.24 | 142,234 |
| 59 | 17420000 | Tres Marias          | Teles Pires | 12/2/1975  | 3/30/2014  | 39 | -7.61  | -57.95 | 144,400 |
| 60 | 12840000 | Gaviao               | Jurua       | 6/23/1972  | 1/30/2014  | 42 | -4.84  | -66.85 | 162,000 |
| 61 | 14330000 | Curicuriari          | Negro       | 11/28/1977 | 3/30/2014  | 37 | -0.20  | -66.80 | 194,462 |
| 62 | 12845000 | Vila Bittencourt     | Japura      | 1/27/1980  | 2/27/2014  | 34 | -1.40  | -69.42 | 197,136 |
| 63 | 18460000 | Boa Sorte            | Xingu       | 1/24/1977  | 11/29/2013 | 36 | -6.75  | -51.98 | 206,863 |

— Continues in the next page —

— Come from previous page —

|    |          |                                   |                      |            |            |    |        |        |           |
|----|----------|-----------------------------------|----------------------|------------|------------|----|--------|--------|-----------|
| 64 | 13870000 | Labrea                            | Purus                | 7/5/1967   | 5/30/2014  | 47 | -7.25  | -64.80 | 220,351   |
| 65 | 13880000 | Canutama                          | Purus                | 1/2/1973   | 3/30/2014  | 41 | -6.53  | -64.38 | 230,012   |
| 66 | 12850000 | Acanauí                           | Japura               | 7/9/1973   | 2/27/2014  | 41 | -1.82  | -66.60 | 242,259   |
| 67 | 14420000 | Serrinha                          | Negro                | 11/30/1967 | 3/30/2014  | 47 | -0.48  | -64.83 | 279,945   |
| 68 | 17430000 | Barra Do<br>Sao Manuel<br>Jusante | Tapajos              | 11/2/1975  | 3/30/2014  | 39 | -7.34  | -58.16 | 330,900   |
| 69 | 15200000 | Principe Da<br>Beira              | Guapore              | 4/22/1983  | 7/30/2014  | 31 | -12.43 | -64.43 | 342,833   |
| 70 | 17650000 | Jatoba                            | Tapajos              | 12/21/1972 | 4/14/2012  | 40 | -5.15  | -56.85 | 389,300   |
| 71 | 18850000 | Altamira                          | Xingu                | 6/6/1968   | 4/29/2014  | 46 | -3.21  | -52.21 | 446,203   |
| 72 | 17730000 | Itaituba                          | Tapajos              | 2/13/1968  | 3/30/2014  | 46 | -4.28  | -55.98 | 451,600   |
| 73 | 15250000 | Guajara-<br>Mirim                 | Mamore               | 8/9/1970   | 6/29/2014  | 44 | -10.79 | -65.35 | 589,497   |
| 74 | 15320002 | Abuna                             | Madeira              | 6/28/1976  | 6/29/2014  | 38 | -9.70  | -65.36 | 899,761   |
| 75 | 15400000 | Porto Velho                       | Madeira              | 4/11/1967  | 1/30/2014  | 47 | -8.74  | -63.92 | 954,285   |
| 76 | 11400000 | Sao Paulo de<br>Olivencia         | Solimoes             | 7/19/1973  | 12/30/2011 | 38 | -3.45  | -68.75 | 990,781   |
| 77 | 15630000 | Humaita                           | Madeira              | 4/19/1967  | 4/13/2014  | 47 | -7.51  | -63.02 | 1,066,240 |
| 78 | 15700000 | Manicore                          | Madeira              | 4/25/1967  | 2/27/2014  | 47 | -5.82  | -61.30 | 1,123,670 |
| 79 | 11500000 | Santo An-<br>tonio do<br>Ica      | Solimoes             | 7/15/1973  | 2/27/2014  | 41 | -3.08  | -67.93 | 1,134,540 |
| 80 | 15860000 | Fazenda Vista<br>Alegre           | Madeira              | 5/3/1967   | 2/27/2014  | 47 | -4.90  | -60.03 | 1,324,730 |
| 81 | 13150000 | Itapeua                           | Solimoes             | 4/5/1971   | 1/30/2014  | 43 | -4.06  | -63.03 | 1,769,000 |
| 82 | 14100000 | Manacapuru                        | Solimoes             | 6/29/1972  | 1/30/2014  | 42 | -3.31  | -60.61 | 2,147,740 |
| 83 | 15040000 | Careiro                           | Parana do<br>Careiro | 8/30/1977  | 2/27/2014  | 37 | -3.20  | -59.82 | 2,853,080 |
| 84 | 15030000 | Jatuarana                         | Amazonas             | 8/27/1977  | 2/27/2014  | 37 | -3.05  | -59.68 | 2,854,290 |
| 85 | 17050000 | Obidos                            | Amazonas             | 2/23/1968  | 1/30/2015  | 47 | -1.95  | -55.51 | 4,680,000 |

## Estimation of power laws

The scaling relations given by power laws  $E[Q^k] = \gamma A^\delta$  (equivalent to Equation (1) with  $S = A$ ) and  $E[Q^k] = \alpha LA^\beta$  (equivalent to Equation (7)), respectively, are equivalent to the linear functions

$$\ln(E[Q^k]) = \ln(\gamma) + \delta \ln(A), \quad (\text{S1})$$

5 and

$$\ln(E[Q^k]) = \ln(\alpha) + \beta \ln(LA), \quad (\text{S2})$$

where the scaling exponent ( $\delta$  or  $\beta$ ) and coefficient ( $\gamma$  or  $\alpha$ ) can be estimated from linear regressions between  $\ln(E[Q^k])$  and either  $\ln(A)$  or  $\ln(LA)$ .  $E[Q^k]$  is the  $k$ th order statistical moment of the probability distribution function of mean or extreme river flows,  $A$  is the drainage area, and  $LA$  is the cumulative leaf area of the river basin. These linear regressions were  
10 computed through standard least-squares methods. The statistical moments  $E[Q^k]$  were estimated from time series of annual mean and extreme (floods and low flows) river flows obtained from the daily records described in Table S1. The cumulative leaf area associated with each gauge was estimated as  $LA = A \times \overline{LAI}$  where  $\overline{LAI}$  is the long-term (1981–2012) average leaf area index spatially averaged over  $A$ , using published data of annual  $LAI$ . Figure 1 shows the resulting  $\overline{LAI}$  map.

15 Figures S1 to S6 show that mean flows, low flows and floods, scale with drainage area (we will refer to this as *hydrological scaling*) as well as with leaf area (*ecohydrological scaling*), in the whole Amazon river basin (Fig. S1) and in its five major sub-basins treated as independent systems: the Negro, Solimoes, Madeira, Tapajos and Xingu (Figs. S2–S6).

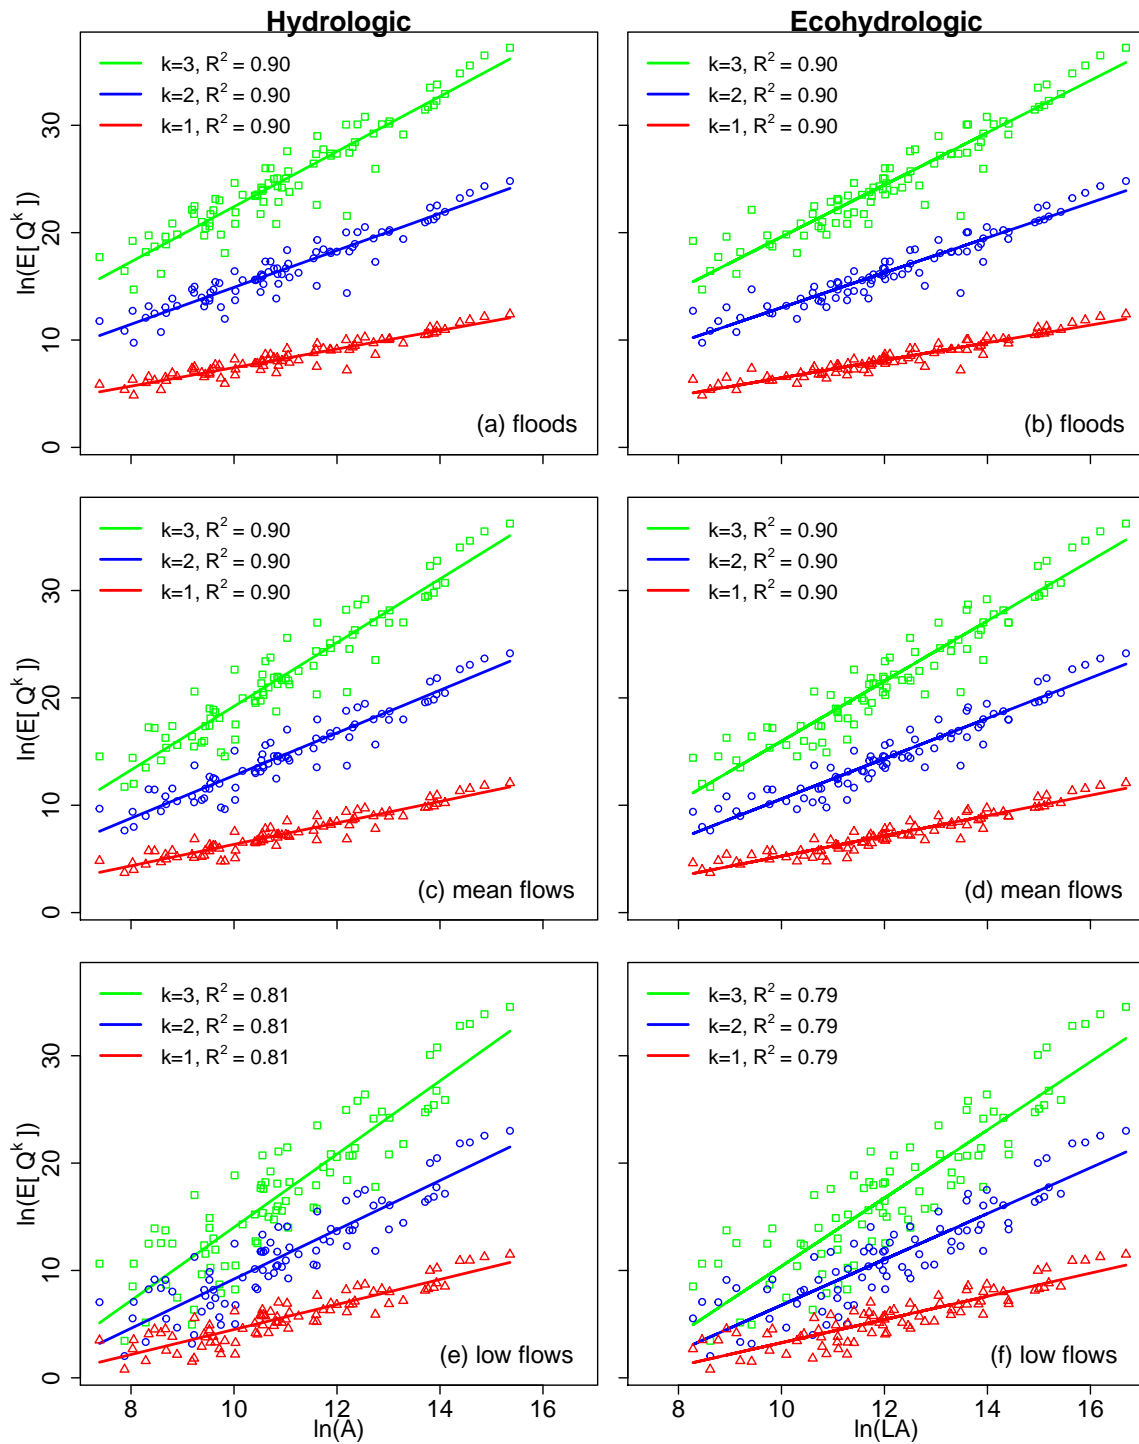

**Figure S1.** Hydrologic (left) and ecohydrologic (right) scaling power-law relations for floods (top), mean flows (middle) and low flows (bottom), in the whole Amazon basin, for different orders ( $k$ ) of the statistical moments.

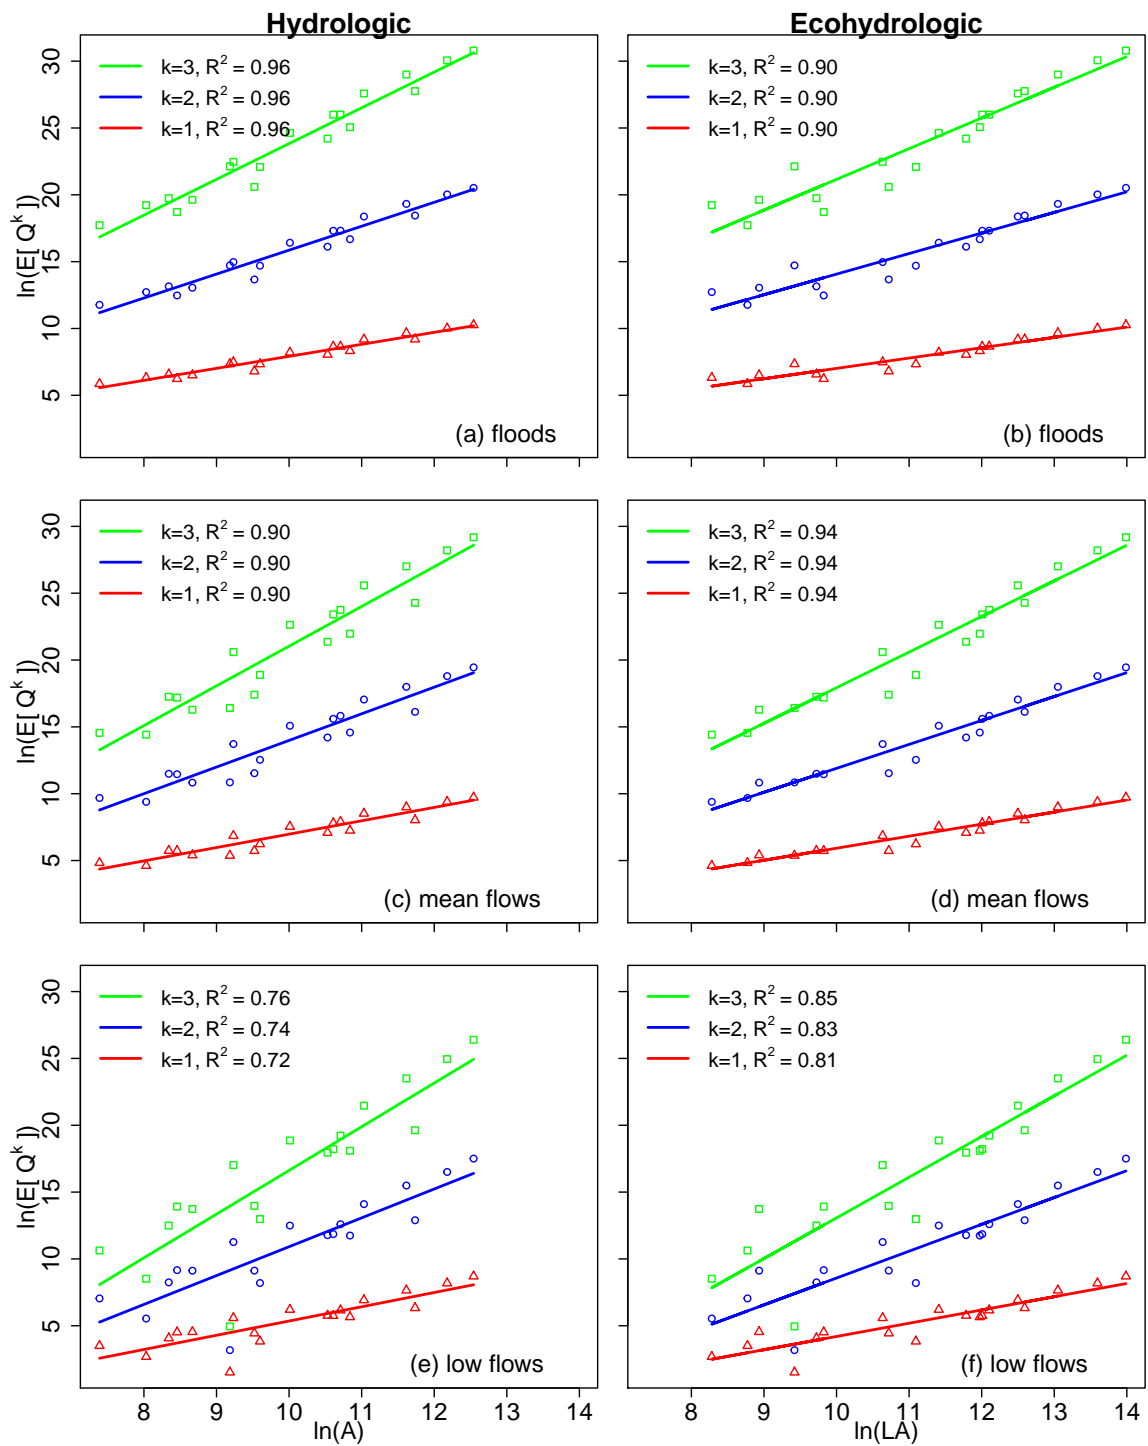

Figure S2. Same as Fig. S1 but for the Negro basin.



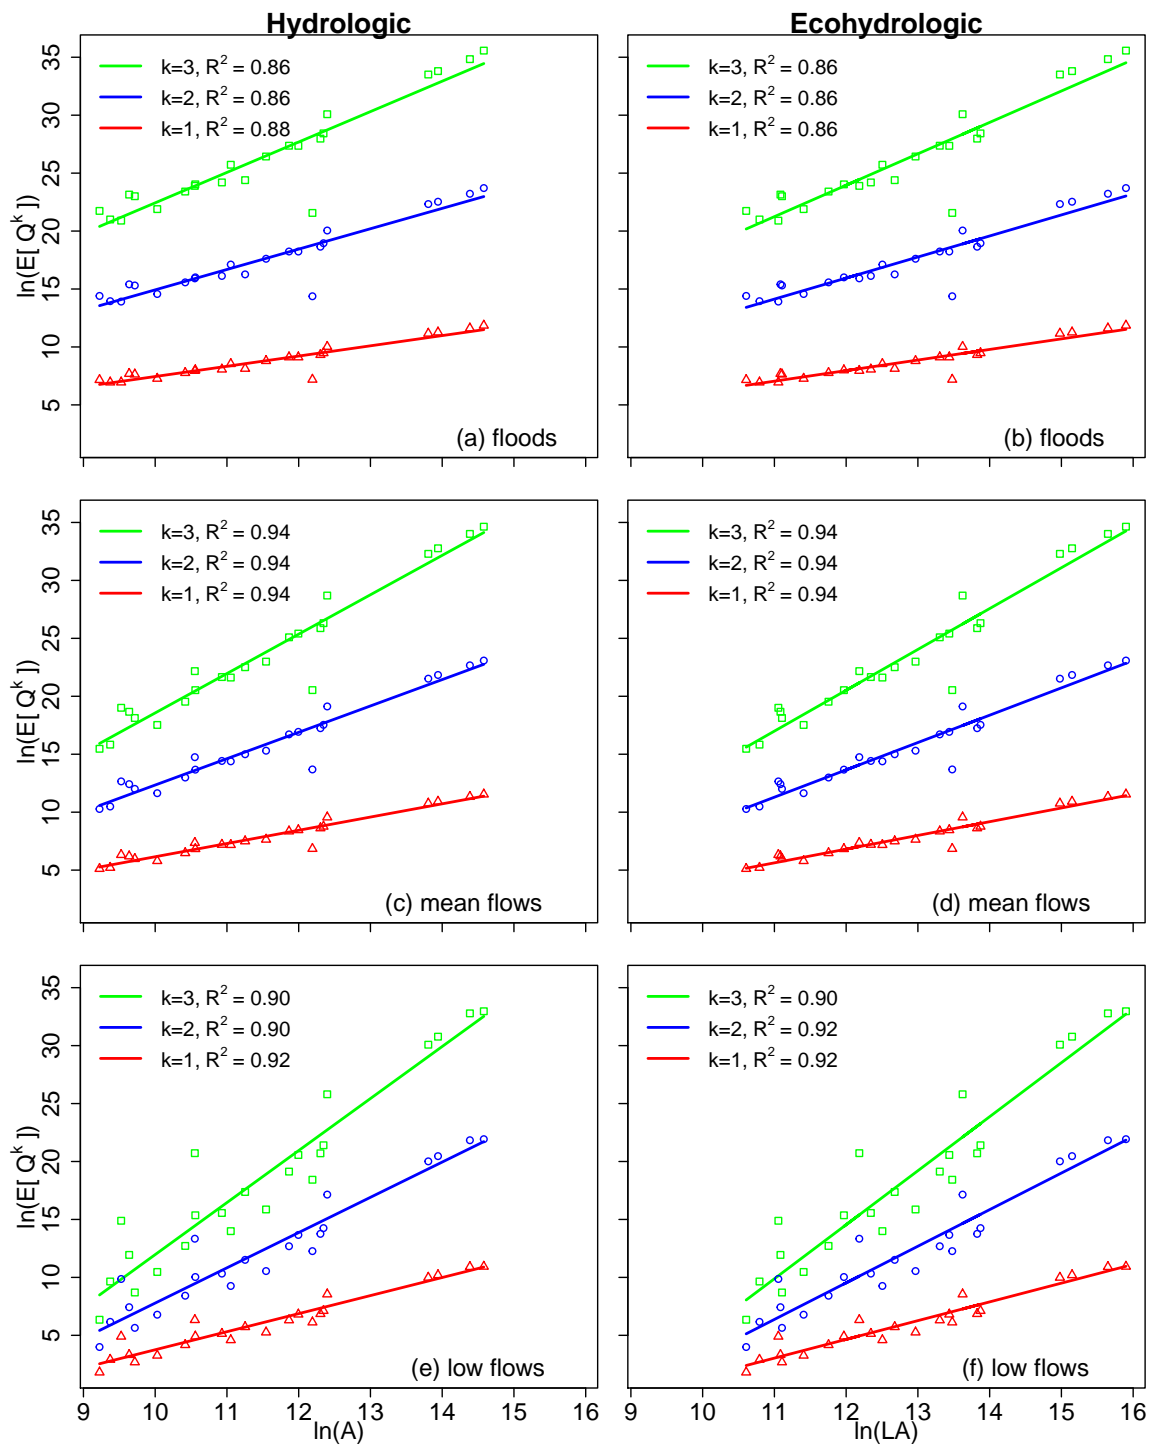

Figure S3. Same as Fig. S1 but for the Solimoes basin.

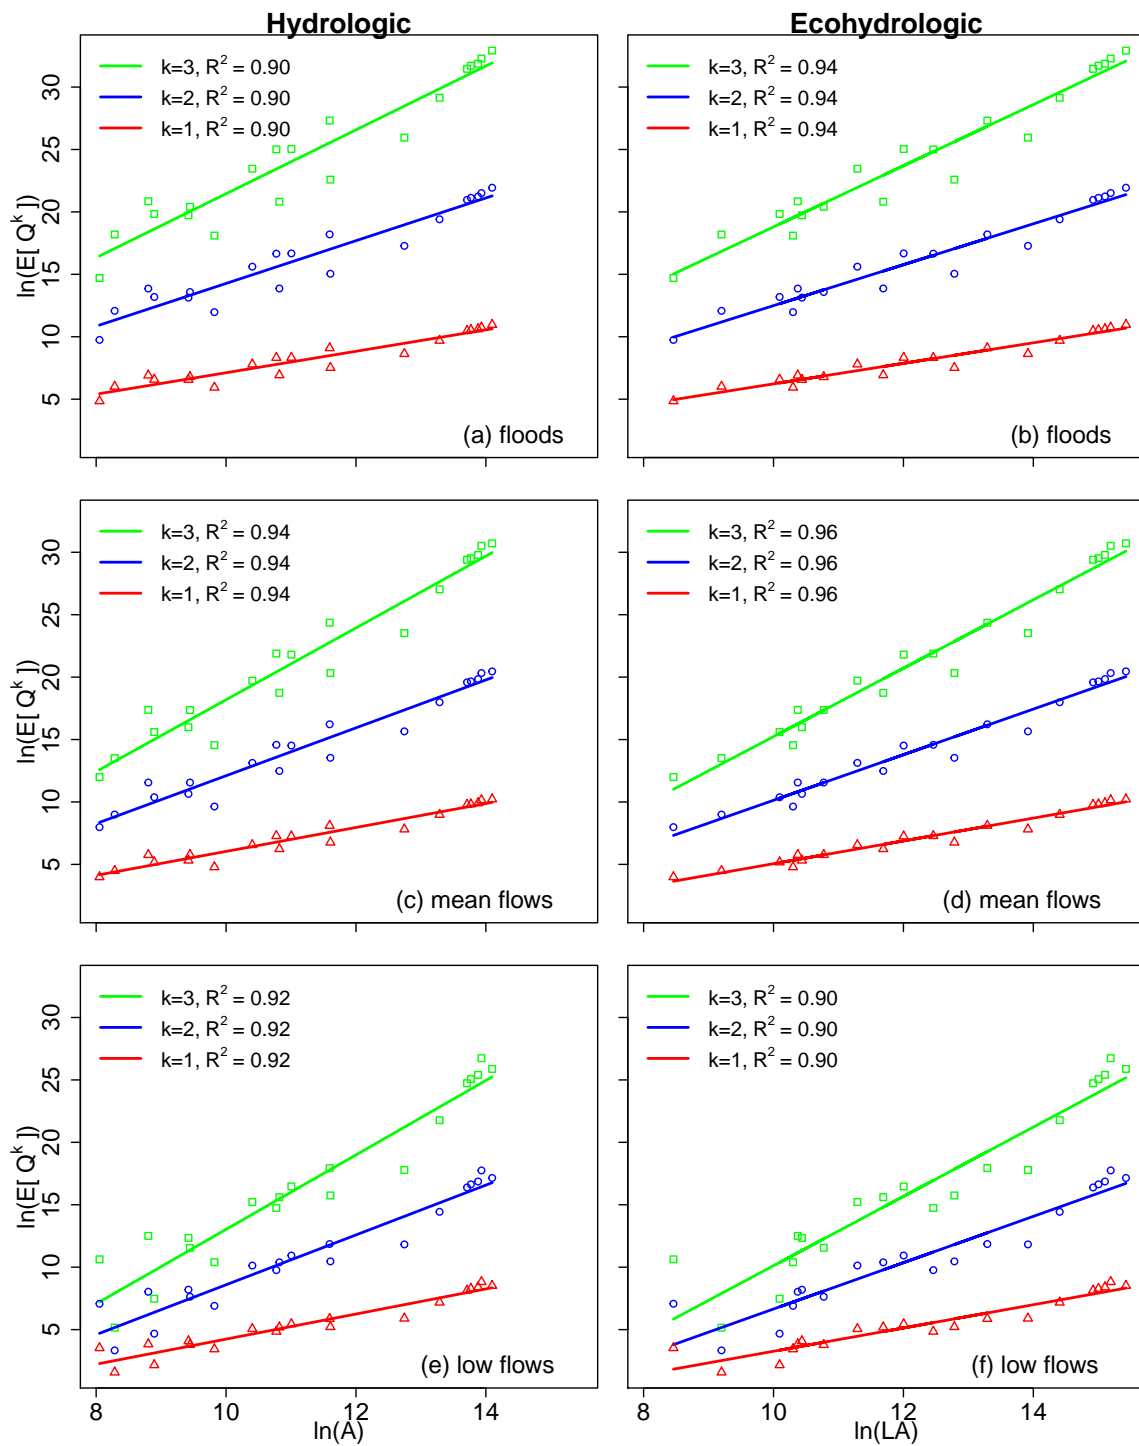

**Figure S4.** Same as Fig. S1 but for the Madeira basin.

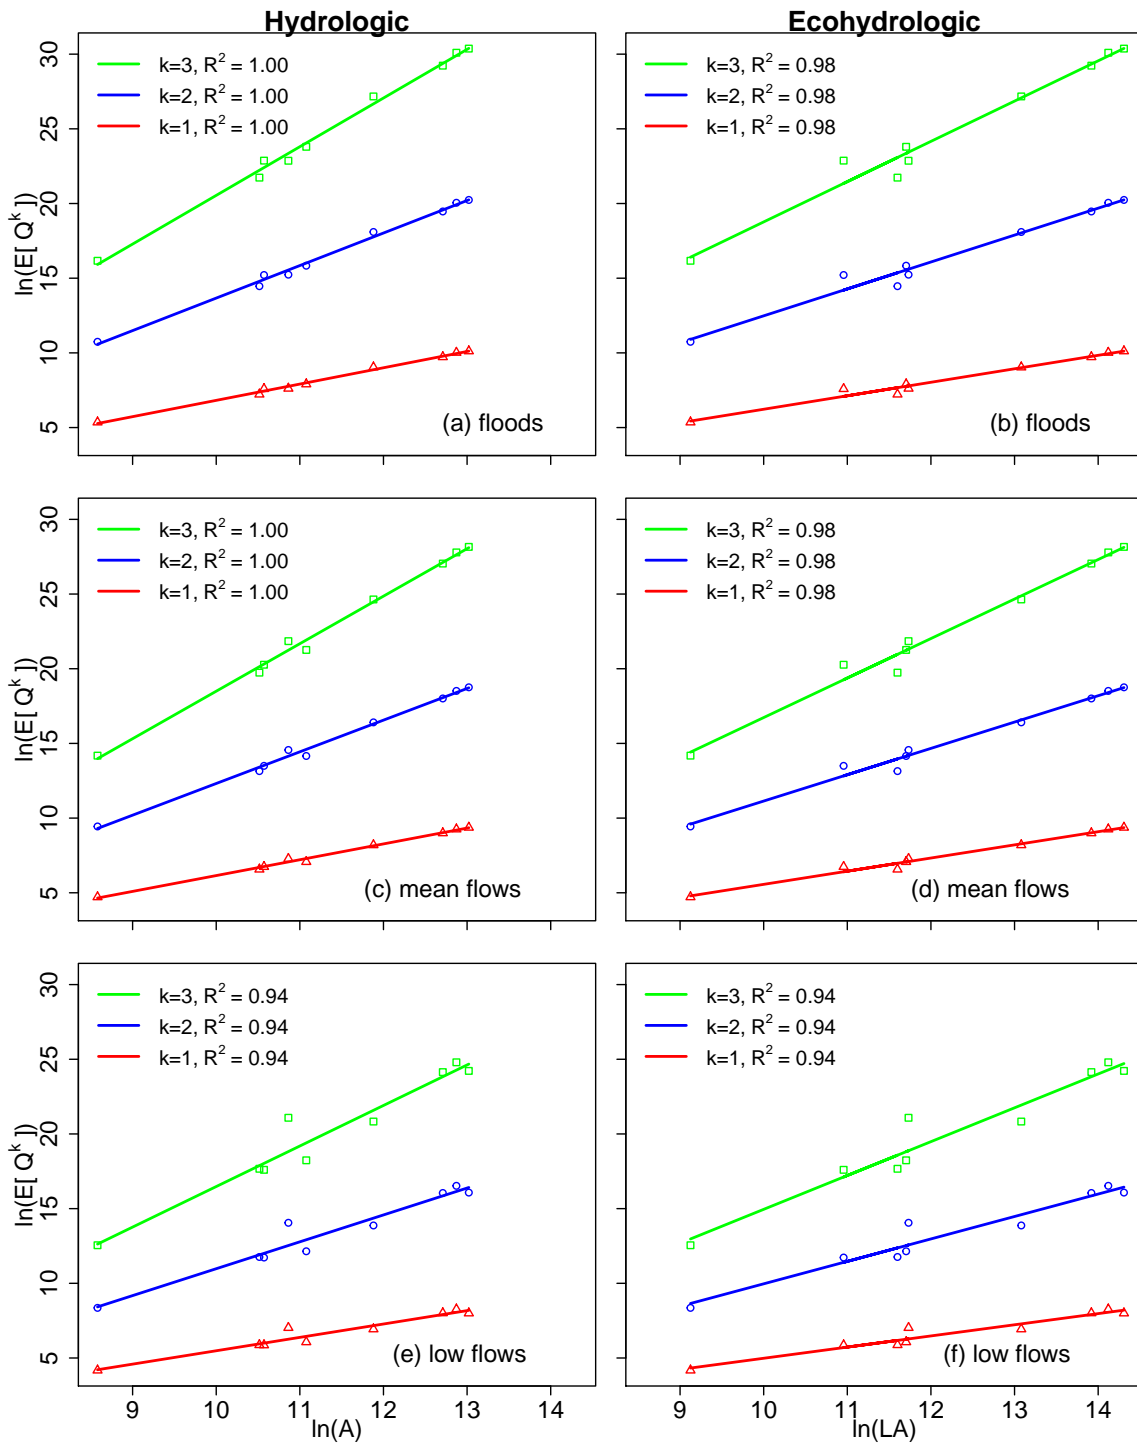

Figure S5. Same as Fig. S1 but for the Tapajos basin.

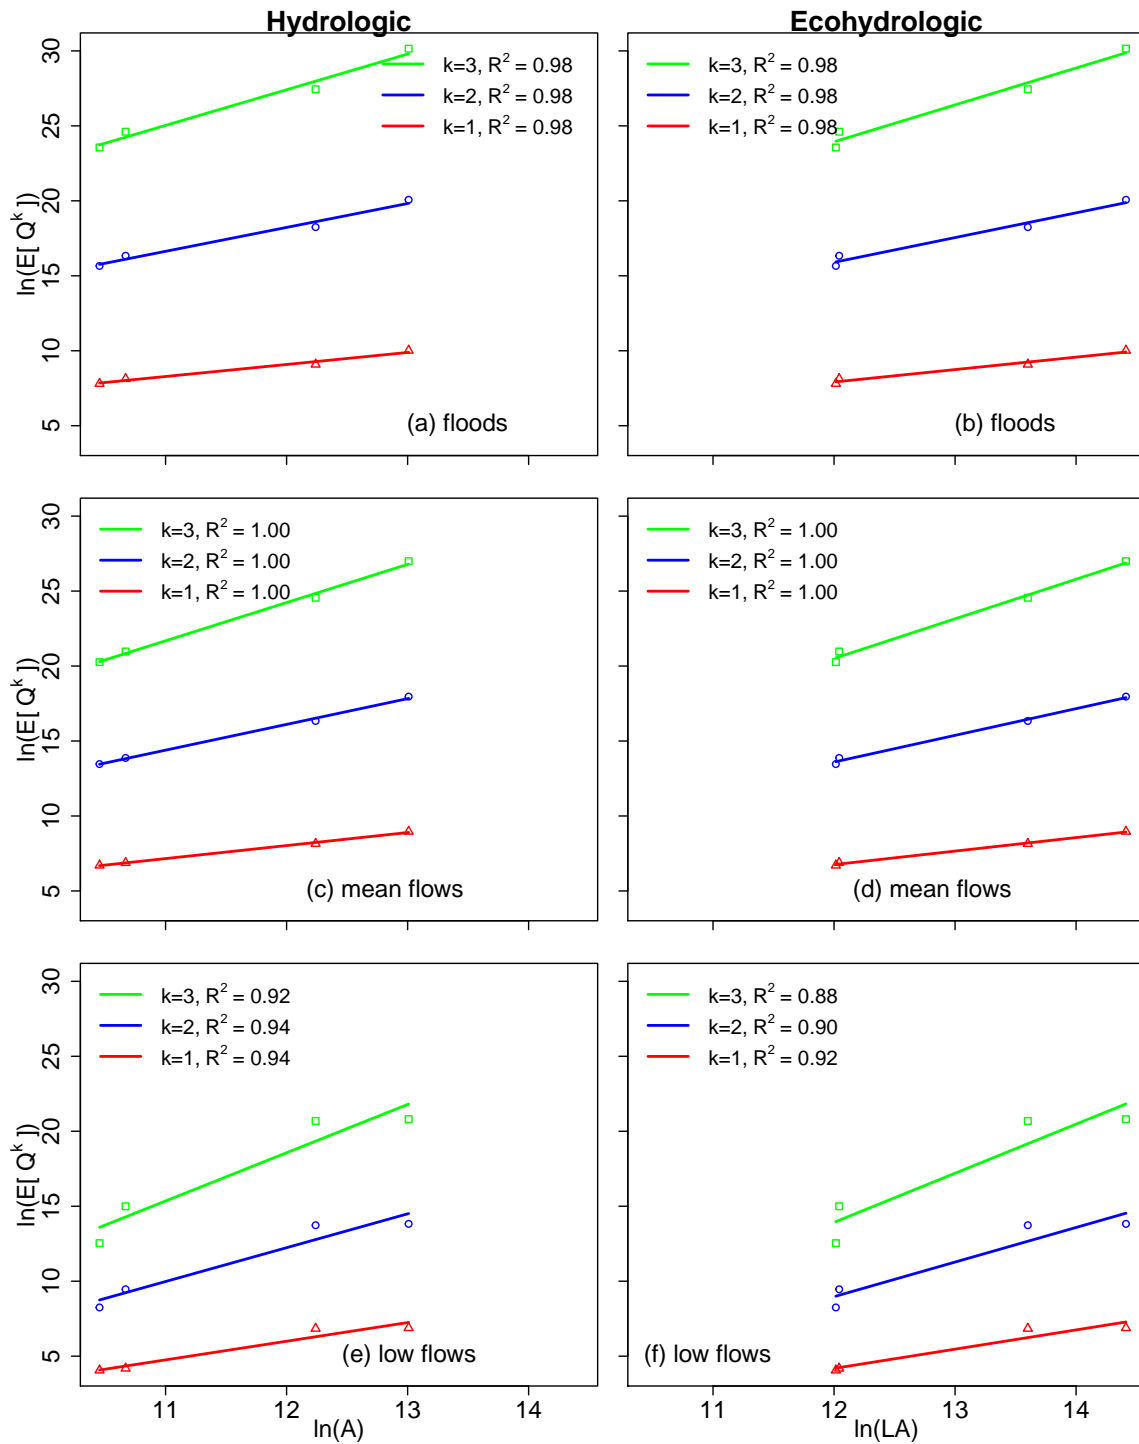

Figure S6. Same as Fig. S1 but for the Xingu basin.

The statistical significance of the ecohydrological scaling (Equation (7)) was evaluated through the determination and correlation coefficients ( $R^2$  and  $r$ , Fig. 1 and Figs. S1–S6), as well as by testing the hypothesis that  $\ln(E[Q^k])$  and  $\ln(LA)$  are not linearly related, i.e. the null hypothesis  $H_0 : \beta = 0$ , through standard  $t$ -tests. All the  $t$ -tests show that  $\ln(E[Q^k])$  and  $\ln(LA)$  have a statistically significant ( $p < 0.05$ ) linear relation (Table S2).

**Table S2.**  $t$ -tests for the significance of the regressions in the ecohydrological scaling for the first statistical moment of river flows. In all cases the null hypothesis,  $H_0$  is rejected, so the alternative hypothesis,  $H_a$ , is accepted.

| Basin    | Q type    | $H_0$         | $H_a$            | $p$ -value | Test result  | Conclusion       |
|----------|-----------|---------------|------------------|------------|--------------|------------------|
| Amazon   | Flood     | $\beta_F = 0$ | $\beta_F \neq 0$ | 1.60E-43   | reject $H_0$ | $\beta_F \neq 0$ |
|          | Mean flow | $\beta_M = 0$ | $\beta_M \neq 0$ | 4.30E-44   | reject $H_0$ | $\beta_M \neq 0$ |
|          | Low flow  | $\beta_L = 0$ | $\beta_L \neq 0$ | 4.14E-29   | reject $H_0$ | $\beta_L \neq 0$ |
| Negro    | Flood     | $\beta_F = 0$ | $\beta_F \neq 0$ | 2.12E-10   | reject $H_0$ | $\beta_F \neq 0$ |
|          | Mean flow | $\beta_M = 0$ | $\beta_M \neq 0$ | 5.05E-12   | reject $H_0$ | $\beta_M \neq 0$ |
|          | Low flow  | $\beta_L = 0$ | $\beta_L \neq 0$ | 1.60E-07   | reject $H_0$ | $\beta_L \neq 0$ |
| Solimoes | Flood     | $\beta_F = 0$ | $\beta_F \neq 0$ | 9.54E-11   | reject $H_0$ | $\beta_F \neq 0$ |
|          | Mean flow | $\beta_M = 0$ | $\beta_M \neq 0$ | 6.17E-14   | reject $H_0$ | $\beta_M \neq 0$ |
|          | Low flow  | $\beta_L = 0$ | $\beta_L \neq 0$ | 3.92E-13   | reject $H_0$ | $\beta_L \neq 0$ |
| Madeira  | Flood     | $\beta_F = 0$ | $\beta_F \neq 0$ | 8.49E-13   | reject $H_0$ | $\beta_F \neq 0$ |
|          | Mean flow | $\beta_M = 0$ | $\beta_M \neq 0$ | 9.17E-13   | reject $H_0$ | $\beta_M \neq 0$ |
|          | Low flow  | $\beta_L = 0$ | $\beta_L \neq 0$ | 2.32E-10   | reject $H_0$ | $\beta_L \neq 0$ |
| Tapajos  | Flood     | $\beta_F = 0$ | $\beta_F \neq 0$ | 8.41E-07   | reject $H_0$ | $\beta_F \neq 0$ |
|          | Mean flow | $\beta_M = 0$ | $\beta_M \neq 0$ | 2.15E-07   | reject $H_0$ | $\beta_M \neq 0$ |
|          | Low flow  | $\beta_L = 0$ | $\beta_L \neq 0$ | 2.38E-05   | reject $H_0$ | $\beta_L \neq 0$ |
| Xingu    | Flood     | $\beta_F = 0$ | $\beta_F \neq 0$ | 1.00E-02   | reject $H_0$ | $\beta_F \neq 0$ |
|          | Mean flow | $\beta_M = 0$ | $\beta_M \neq 0$ | 2.00E-03   | reject $H_0$ | $\beta_M \neq 0$ |
|          | Low flow  | $\beta_L = 0$ | $\beta_L \neq 0$ | 4.00E-02   | reject $H_0$ | $\beta_L \neq 0$ |

## 5 Tests for the difference between the values of the scaling exponents and the critical value 1

Figure 3 indicates whether the values of the scaling exponents ( $\beta_i$ ,  $i = L, M, F$ ) are significantly ( $p < 0.05$ ) different, either higher or lower, from the critical value 1. This is based on the  $t$ -tests results showed in Tables S3–S8. Why 1 is regarded as a critical value is explained in the main text. In the Xingu basin, the hypothesis that all exponents are equal to 1 can not be rejected (this is indicated by the black dots in Fig. 3). This can be attributed to the small number of degrees of freedom given by the number of gauges within this basin. However, we keep some of the results for this river basin because the scaling relation given by Equation (7) is still statistically significant ( $p < 0.05$ ) for mean and extreme river flows (Table S2).

**Table S3.** *t*-tests for the difference between the critical value 1 and the scaling exponents for floods ( $\beta_F$ ), mean flows ( $\beta_M$ ), and low flows ( $\beta_L$ ) in the Amazon basin.

| Q type    | $H_0$            | $H_a$            | <i>p</i> -value | Test result         | Conclusion       |
|-----------|------------------|------------------|-----------------|---------------------|------------------|
| Flood     | $\beta_F = 1$    | $\beta_F \neq 1$ | 2.45E-08        | reject $H_0$        | $\beta_F < 1$    |
|           | $\beta_F \geq 1$ | $\beta_F < 1$    | 1.22E-08        | reject $H_0$        |                  |
| Mean flow | $\beta_M = 1$    | $\beta_M \neq 1$ | 1.00E-01        | do not reject $H_0$ | $\beta_M \leq 1$ |
|           | $\beta_M \geq 1$ | $\beta_M < 1$    | 5.00E-02        | reject $H_0$        |                  |
| Low flow  | $\beta_L = 1$    | $\beta_L \neq 1$ | 2.00E-01        | do not reject $H_0$ | $\beta_L = 1$    |
|           | $\beta_L \leq 1$ | $\beta_L > 1$    | 1.00E-01        | do not reject $H_0$ |                  |

**Table S4.** Same as Table S3 but for the Negro basin.

| Q type    | $H_0$            | $H_a$            | <i>p</i> -value | Test result         | Conclusion       |
|-----------|------------------|------------------|-----------------|---------------------|------------------|
| Flood     | $\beta_F = 1$    | $\beta_F \neq 1$ | 1.17E-03        | reject $H_0$        | $\beta_F < 1$    |
|           | $\beta_F \geq 1$ | $\beta_F < 1$    | 5.83E-04        | reject $H_0$        |                  |
| Mean flow | $\beta_M = 1$    | $\beta_M \neq 1$ | 8.26E-02        | do not reject $H_0$ | $\beta_M \leq 1$ |
|           | $\beta_M \geq 1$ | $\beta_M < 1$    | 4.13E-02        | reject $H_0$        |                  |
| Low flow  | $\beta_L = 1$    | $\beta_L \neq 1$ | 9.45E-01        | do not reject $H_0$ | $\beta_L = 1$    |
|           | $\beta_L \leq 1$ | $\beta_L > 1$    | 4.72E-01        | do not reject $H_0$ |                  |

**Table S5.** Same as Table S3 but for the Solimoes basin.

| Q type    | $H_0$            | $H_a$            | <i>p</i> -value | Test result         | Conclusion    |
|-----------|------------------|------------------|-----------------|---------------------|---------------|
| Flood     | $\beta_F = 1$    | $\beta_F \neq 1$ | 2.70E-01        | do not reject $H_0$ | $\beta_F = 1$ |
|           | $\beta_F \geq 1$ | $\beta_F < 1$    | 1.34E-01        | do not reject $H_0$ |               |
| Mean flow | $\beta_M = 1$    | $\beta_M \neq 1$ | 1.34E-02        | reject $H_0$        | $\beta_M > 1$ |
|           | $\beta_M \leq 1$ | $\beta_M > 1$    | 6.74E-03        | reject $H_0$        |               |
| Low flow  | $\beta_L = 1$    | $\beta_L \neq 1$ | 5.53E-06        | reject $H_0$        | $\beta_L > 1$ |
|           | $\beta_L \leq 1$ | $\beta_L > 1$    | 2.76E-06        | reject $H_0$        |               |

**Table S6.** Same as Table S3 but for the Madeira basin.

| <b>Q type</b> | $H_0$            | $H_a$            | $p$ -value | <b>Test result</b>  | <b>Conclusion</b> |
|---------------|------------------|------------------|------------|---------------------|-------------------|
| Flood         | $\beta_F = 1$    | $\beta_F \neq 1$ | 1.33E-03   | reject $H_0$        | $\beta_F < 1$     |
|               | $\beta_F \geq 1$ | $\beta_F < 1$    | 6.65E-04   | reject $H_0$        |                   |
| Mean flow     | $\beta_M = 1$    | $\beta_M \neq 1$ | 4.33E-02   | reject $H_0$        | $\beta_M < 1$     |
|               | $\beta_M \geq 1$ | $\beta_M < 1$    | 2.16E-02   | reject $H_0$        |                   |
| Low flow      | $\beta_L = 1$    | $\beta_L \neq 1$ | 3.70E-01   | do not reject $H_0$ | $\beta_L = 1$     |
|               | $\beta_L \geq 1$ | $\beta_L < 1$    | 1.85E-01   | do not reject $H_0$ |                   |

**Table S7.** Same as Table S3 but for the Tapajos basin.

| <b>Q type</b> | $H_0$            | $H_a$            | $p$ -value | <b>Test result</b>  | <b>Conclusion</b> |
|---------------|------------------|------------------|------------|---------------------|-------------------|
| Flood         | $\beta_F = 1$    | $\beta_F \neq 1$ | 1.26E-01   | do not reject $H_0$ | $\beta_F = 1$     |
|               | $\beta_F \geq 1$ | $\beta_F < 1$    | 6.29E-02   | do not reject $H_0$ |                   |
| Mean flow     | $\beta_M = 1$    | $\beta_M \neq 1$ | 3.27E-02   | reject $H_0$        | $\beta_M < 1$     |
|               | $\beta_M \geq 1$ | $\beta_M < 1$    | 1.63E-02   | reject $H_0$        |                   |
| Low flow      | $\beta_L = 1$    | $\beta_L \neq 1$ | 1.27E-02   | reject $H_0$        | $\beta_L < 1$     |
|               | $\beta_L \geq 1$ | $\beta_L < 1$    | 6.33E-03   | reject $H_0$        |                   |

**Table S8.** Same as Table S3 but for the Xingu basin.

| <b>Q type</b> | $H_0$            | $H_a$            | $p$ -value | <b>Test result</b>  | <b>Conclusion</b> |
|---------------|------------------|------------------|------------|---------------------|-------------------|
| Flood         | $\beta_F = 1$    | $\beta_F \neq 1$ | 2.30E-01   | do not reject $H_0$ | $\beta_F = 1$     |
|               | $\beta_F \geq 1$ | $\beta_F < 1$    | 1.10E-01   | do not reject $H_0$ |                   |
| Mean flow     | $\beta_M = 1$    | $\beta_M \neq 1$ | 1.40E-01   | do not reject $H_0$ | $\beta_M = 1$     |
|               | $\beta_M \geq 1$ | $\beta_M < 1$    | 7.00E-02   | do not reject $H_0$ |                   |
| Low flow      | $\beta_L = 1$    | $\beta_L \neq 1$ | 3.80E-01   | do not reject $H_0$ | $\beta_L = 1$     |
|               | $\beta_L \leq 1$ | $\beta_L > 1$    | 1.90E-01   | do not reject $H_0$ |                   |
